# Supplementary material
Source: PubMed Central journal article supplement (PMC2606006)
Supplement: M805980200_1.pdf [file M805980200_1.pdf]

## Supplement Figures A &amp; B

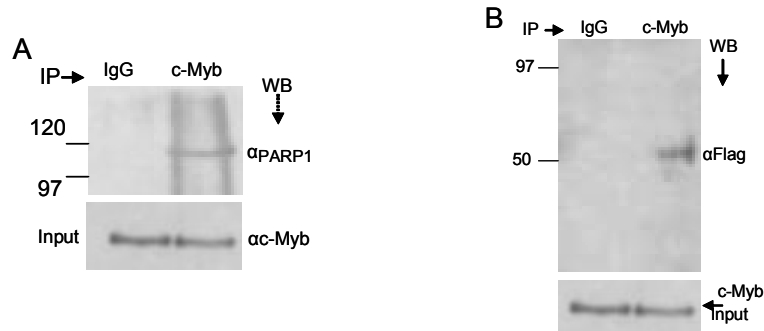

Figure Legend S-A & S-B. **Physical association between intracellular c-Myb and PARP-1 (A) or p53 (B).** A). co-immunoprecipitation of PARP-1 with c-Myb from c-Myb-transfected cells. Co-immunoprecipitated PARP-1 was detected by Western blotting using anti-PARP-1 antibody. B). c-Myb/p53 interaction shown by co-IP assay of cells transfected with Flag-tagged p53. Co-immunoprecipitated p53 was identified by Western blotting using an anti-Flag antibody.

## SUPPLEMENTAL TEXT

1. SiRNA oligo sequences: SiGENOME SMARTpool Si RNAs for B-Myb, c-Myb, PARP-1, hnRNPK and p53 (purchased from Dharmacon, Lafayette,CO) were used for the study. Sequences, provided by the vendor are as follows.

B-Myb sense sequences (also known as human MYB-L2; Cat # M-010444-00-0005)

GAAACGAGCCUGCCUACA  
 GGACACAGGAGGCUUCUUG  
 UAACCGCACUGACCAGCAA  
 GUAACAGCCUCACGCCAA

c-MYB sense sequences (Cat# M-003910-00-0005)

CCGAAACGUUGGUCUGUUA  
 CAACACCAUUUCAUAGAGA  
 CAACGACUAUCCUAUAC  
 GAAAUACGGUCCGAAACGU

PARP-1sense sequences (Cat# L-006656-00-0010)

GAUUUCAUCUGGUGUGAUA  
 GAAAACAGGUAUUGGAUUA  
 GUUCUUAGCGCACAUCUUG  
 CCAAUAGGCUUAAUCCUGU

hnRNPK sense sequences (Cat# L-011692-00-0010)

UAAACGCCUGCAGAAGAU  
 GGUCGUGGCUCAUAUGGUG

UGACAGAGUUGUUCUUAUU  
GCAAGAAUAUUAAGGCUCU

p53 sense sequences (Cat# I-003329-00-0010)

GAAAUUUGCGUGUGGAGUAUU  
GUGCAGCUGUGGGUUGAUUUU  
GCAGUCAGAUCUAGCGUCUU  
GGAGAAUAUUUCACCCUUCUU

2. Primer sequences to probe rat AR mRNA levels in the liver and in H4IIE rat hepatoma cells.

5'-TTCACCAATGTCAACTCCAGGA (forward, at +2262);  
5'-CTTGACACAGAGATGATCTCTG (reverse, at +2689).
